# Supplementary material for: Pinnacle Ultamet metal-on-metal total hip arthroplasty survivorship: average 10-year follow-up
Source: PubMed Central journal article supplement — Arthroplast Today. 2020 May 29;6(3):596–600.e1. doi: 10.1016/j.artd.2020.02.010 (PMC7502581; doi:10.1016/j.artd.2020.02.010), 2020-05-29
Supplement: mmc5.pdf [file mmc5.pdf]

# INDIVIDUAL CONFLICT OF INTEREST STATEMENT

## *American Association of Hip and Knee Surgeons*

(Adopted from the American Academy of Orthopaedic Surgeons disclosure statement)

The following form **must be filled out completely and submitted by each author (example, 6 authors, 6 forms).**  
**All items require a response. If there is no relevant disclosure for a given item, enter "None."**

**Manuscript Title** Pinnacle Ultamet Metal on Metal Total Hip Arthroplasty Survivorship: Average 10 year follow-up

---

1. Royalties from a company or supplier (The following conflicts were disclosed)  
*DePuy.*
2. Speakers bureau/paid presentations for a company or supplier (The following conflicts were disclosed)  
*DePuy*
- 3A. Paid employee for a company or supplier (The following conflicts were disclosed)  
*none.*
- 3B. Paid consultant for a company or supplier (The following conflicts were disclosed)  
*none.*
- 3C. Unpaid consultants for a company or supplier (The following conflicts were disclosed)  
*none.*
4. Stock or stock options in a company or supplier (The following conflicts were disclosed)  
*none.*
5. Research support from a company or supplier as a Principal Investigator (The following conflicts were disclosed)  
*none.*
6. Other financial or material support from a company or supplier (The following conflicts were disclosed)  
*none.*
7. Royalties, financial or material support from publishers (The following conflicts were disclosed)  
*none.*
8. Medical/Orthopaedic publications editorial/governing board (The following conflicts were disclosed)  
*none.*
9. Board member/committee appointments for a society (The following conflicts were disclosed)  
*none.*

**Each author must sign AND print or type his/her name, date and submit a separate form**

In addition, one BLINDED Conflict of Interest form (no author names used) should be submitted per manuscript with all author disclosures.

*David A. M. [Signature]* *David G. [Signature]* 9/11/19  
Author Name (Print or Type) Author Signature Date
